# Supplementary material for: An integrated approach to quantifying uncertainties in the remaining carbon budget
Source: Springer Nature journal article supplement (doi:10.1038/s43247-020-00064-9), 2021-01-18
Supplement: MOESM1 [file 43247_2020_64_MOESM1_ESM.pdf]

# **An integrated approach to quantifying uncertainties in the remaining carbon budget**

H. Damon Matthews<sup>1†\*</sup>, Katarzyna B. Tokarska<sup>2†\*</sup>, Joeri Rogelj<sup>3,4</sup>, Christopher J. Smith<sup>4,5</sup>, Andrew H. MacDougall<sup>6</sup>, Karsten Haustein<sup>7</sup>, Nadine Mengis<sup>8,9</sup>, Sebastian Sippel<sup>2</sup>, Piers M. Forster<sup>5</sup>, and Reto Knutti<sup>2</sup>

† These authors contributed equally to this work

\* corresponding authors: [damon.matthews@concordia.ca](mailto:damon.matthews@concordia.ca), [kasia.tokarska@env.ethz.ch](mailto:kasia.tokarska@env.ethz.ch)

<sup>1</sup> Concordia University, Montréal, Canada

<sup>2</sup> Institute for Atmospheric and Climate Science, ETH Zurich, Zurich, Switzerland

<sup>3</sup> Grantham Institute, Imperial College London, London, United Kingdom

<sup>4</sup> International Institute for Applied Systems Analysis (IIASA), Laxenburg, Austria

<sup>5</sup> Priestley International Centre for Climate, University of Leeds, Leeds, LS2 9JT, UK

<sup>6</sup> St. Francis Xavier University, Antigonish, Nova Scotia, Canada

<sup>7</sup> Environmental Change Institute, University of Oxford, Oxford, United Kingdom

<sup>8</sup> GEOMAR, Helmholtz Centre for Ocean Research, Kiel, Germany

<sup>9</sup> Simon Fraser University, Burnaby, British Columbia, Canada

## **Supplementary Material**

| Parameter (and its full name)                                                                        | Input distribution in the “Main case”                                                                         | Sensitivity analysis                                                                                                                                                                                       | Distribution details                                                                                                                                                                      |
|------------------------------------------------------------------------------------------------------|---------------------------------------------------------------------------------------------------------------|------------------------------------------------------------------------------------------------------------------------------------------------------------------------------------------------------------|-------------------------------------------------------------------------------------------------------------------------------------------------------------------------------------------|
| $f_{nc}$<br>Ratio of non-CO <sub>2</sub> to total anthropogenic radiative forcing                    | Empirical distribution (Fig. S1 a) with median value of 0.14, mean of 0.13, and 5-95% range of -0.11 to 0.33. | Gaussian distribution fitted to the empirical distribution ( $\mu = 0.14$ and $\sigma = 0.17$ for the $1\sigma$ case. For the ‘2 std Gaussian fit case’, the value of $\sigma$ was doubled, see Fig. S1 a) | Forcing ratios calculated from the updated radiative forcing database that will be used for AR6 (mean for 2010-2019), using the FaIR model emulator (Smith et al. 2018)                   |
| $E$<br>Cumulative CO <sub>2</sub> emissions                                                          | 640 PgC $\pm$ 65 PgC (as $1\sigma$ range) from 1870 to the end of 2019                                        | Gaussian distribution fitted to: $\mu = 640$ PgC $\sigma = 65$ PgC draw random samples from (Fig. S1 b)                                                                                                    | Based on Global Carbon Project estimates (Friedlingstein et al. 2019)                                                                                                                     |
| $\Delta T_{anth}$<br>Anthropogenic warming in the year 2019 (with respect to the 1850-1900 baseline) | Empirical distribution (Fig. S1b) with median value of 1.18 °C                                                | Gaussian distribution fitted to the empirical distribution ( $\mu = 1.17$ and $\sigma = 0.138$ for the $1\sigma$ case. For the ‘2 std Gaussian fit’ case, the value of $\sigma$ was doubled) (Fig. S1 b)   | 3-dataset average of observed temperature change (HadCRUT-CW, GISTEMP and Berkeley Earth), with natural forced and internal variability removed using the method of Haustein et al. 2017. |

**Supplementary Table S1.** Range of parameters used in sampling to generate distributions of TCRE and Remaining carbon budgets (based on Eq.1 and Eq.3, respectively).

| Parameter (and its full name)                                                                                                               | Input values “Main case”                                                                                                                                                                        | Comments                                                                                                                                                                                                                                                                                                                                                                                   |
|---------------------------------------------------------------------------------------------------------------------------------------------|-------------------------------------------------------------------------------------------------------------------------------------------------------------------------------------------------|--------------------------------------------------------------------------------------------------------------------------------------------------------------------------------------------------------------------------------------------------------------------------------------------------------------------------------------------------------------------------------------------|
| $\Delta T_{anth}$<br><br>Anthropogenic warming in the year 2019 (with respect to the 1850-1900 baseline)                                    | Same as in Table S1.                                                                                                                                                                            |                                                                                                                                                                                                                                                                                                                                                                                            |
| $E$<br><br>Cumulative CO <sub>2</sub> emissions from 1870 to the end of 2019                                                                | Same as in Table S1.                                                                                                                                                                            |                                                                                                                                                                                                                                                                                                                                                                                            |
| $f_{nc}$<br><br>Ratio of non-CO <sub>2</sub> to total anthropogenic radiative forcing                                                       | Same as in Table S1                                                                                                                                                                             |                                                                                                                                                                                                                                                                                                                                                                                            |
| $f_{nc}^*$<br><br>Future ratio of non-CO <sub>2</sub> to total anthropogenic radiative forcing (at the time when emissions reach net zero). | Linearly related to $f_{nc}$<br><br>$f_{nc}^* = 0.3081 f_{nc} + 0.1400$ + offset;<br><br>in the ‘Main case’ the offset is zero, and two sensitivity cases have an offset values of $\pm 0.05$ . | The linear fit based by fitting a first order polynomial using the linear least squares regression. The fit to the distribution of grey points is shown in Fig.3b (based on the SR1.5 scenario database and the FaIR model, similarly as $f_{nc}$ ).<br><br>$f_{nc}^*$ is treated as a constant function of $f_{nc}$ (since it reflects socioeconomic rather than geophysical uncertainty) |
| $\Delta T_{ZEC}$<br><br>Zero Emission Commitment                                                                                            | 0 °C (mean value)<br><br>-0.3 to 0.3 °C<br>(5-95%; Supplementary Fig. S4)                                                                                                                       | fitted Gaussian to 5-95% range, centered on zero<br><br>based on ZECMIP (MacDougall et al. 2020)                                                                                                                                                                                                                                                                                           |
| $\Delta T_{lim}$<br><br>Global mean warming target                                                                                          | 1.5 °C<br>(also 1.75 °C and 2.0 °C in the supplementary Fig. S4 and table S4).                                                                                                                  | treated as a constant                                                                                                                                                                                                                                                                                                                                                                      |

**Supplementary Table S2.** Range of parameters used in sampling to generate distributions of remaining carbon budgets (based on Eq.3).

| TCRE                                      | Median       | 33%          | 67%          | 5%           | 95%          |
|-------------------------------------------|--------------|--------------|--------------|--------------|--------------|
| 'Main case'                               | <b>0.439</b> | <b>0.402</b> | <b>0.480</b> | <b>0.317</b> | <b>0.618</b> |
| 'No uncertainty in any parameters'        | 0.431        | 0.431        | 0.431        | 0.431        | 0.431        |
| 'No uncertainty in T <sub>{anth}</sub> '  | 0.434        | 0.402        | 0.470        | 0.323        | 0.588        |
| 'Gaussian fit T <sub>{anth}</sub> '       | 0.429        | 0.390        | 0.472        | 0.299        | 0.612        |
| '2 std Gaussian fit T <sub>{anth}</sub> ' | 0.427        | 0.373        | 0.486        | 0.243        | 0.674        |
| 'No uncertainty in E'                     | 0.437        | 0.406        | 0.472        | 0.330        | 0.587        |
| 'Gaussian fit E'                          | 0.439        | 0.402        | 0.480        | 0.317        | 0.618        |
| '2 std Gaussian fit E'                    | 0.442        | 0.393        | 0.499        | 0.292        | 0.722        |
| 'No uncertainty in f <sub>{nc}</sub> '    | 0.436        | 0.411        | 0.464        | 0.355        | 0.557        |
| 'Gaussian fit f <sub>{nc}</sub> '         | 0.435        | 0.389        | 0.483        | 0.276        | 0.636        |
| '2 std Gaussian fit f <sub>{nc}</sub> '   | 0.434        | 0.353        | 0.518        | 0.141        | 0.771        |

Supplementary Table S3. Resulting TCRE ranges in °C / 1000GtCO<sub>2</sub>

| 1.5 °C budgets (in GtCO <sub>2</sub> )           | Median | 33% | 67% | 5%   | 95%  |
|--------------------------------------------------|--------|-----|-----|------|------|
| 'Main case'                                      | 443    | 227 | 673 | -307 | 1398 |
| 'No uncertainty in any parameters'               | 491    | 491 | 491 | 491  | 491  |
| 'No uncertainty in ZEC (ZEC = 0)'                | 459    | 296 | 629 | -116 | 1155 |
| '2 std in ZEC'                                   | 433    | 102 | 783 | -743 | 1868 |
| 'No uncertainty in T <sub>{anth}</sub> '         | 476    | 286 | 678 | -191 | 1310 |
| 'Gaussian fit \Delta T <sub>{anth}</sub> '       | 507    | 271 | 767 | -285 | 1643 |
| '2 std Gaussian fit \Delta T <sub>{anth}</sub> ' | 513    | 188 | 909 | -487 | 2612 |
| 'No uncertainty in E'                            | 447    | 230 | 678 | -308 | 1385 |
| 'Gaussian fit E (same as main case)'             | 443    | 227 | 673 | -307 | 1398 |
| '2 std Gaussian fit E'                           | 429    | 218 | 662 | -303 | 1439 |
| 'No uncertainty in f <sub>{nc}</sub> '           | 451    | 265 | 641 | -215 | 1195 |
| 'Gaussian fit \sigma f <sub>{nc}</sub> '         | 475    | 233 | 746 | -329 | 1737 |
| '2 std Gaussian fit f <sub>{nc}</sub> '          | 473    | 133 | 926 | -538 | 4080 |
| <b>Socio-economic uncertainty</b>                |        |     |     |      |      |
| 'high f <sub>{nc}</sub> * (intercept + 0.05)'    | 274    | 74  | 487 | -427 | 1155 |
| 'low f <sub>{nc}</sub> * (intercept -0.05)'      | 612    | 381 | 860 | -187 | 1642 |

Supplementary Table S4. Resulting remaining carbon budget ranges for 1.5 °C target.

| 1.75 °C budgets (in GtCO <sub>2</sub> ) | Median | 33% | 67%   | 5%   | 95%   |
|-----------------------------------------|--------|-----|-------|------|-------|
| 'Main case'                             | 908    | 670 | 1'164 | 86   | 1'970 |
| 'No uncertainty in any parameters'      | 964    | 964 | 964   | 964  | 964   |
| 'No uncertainty in ZEC (ZEC = 0)'       | 924    | 731 | 1'126 | 251  | 1'755 |
| '2 std in ZEC'                          | 896    | 549 | 1'263 | -314 | 2'415 |
| 'No uncertainty in T_{anth}'            | 944    | 739 | 1'165 | 234  | 1'862 |
| 'Gaussian fit \Delta T_{anth}'          | 982    | 718 | 1'273 | 109  | 2'262 |
| '2 std Gaussian fit \Delta T_{anth}'    | 989    | 617 | 1'443 | -141 | 3'408 |
| 'No uncertainty in E'                   | 916    | 678 | 1'169 | 87   | 1'942 |
| 'Gaussian fit E (same as main case)'    | 908    | 670 | 1'164 | 86   | 1'970 |
| '2 std Gaussian fit E'                  | 885    | 643 | 1'154 | 83   | 2'054 |
| 'No uncertainty in f_{nc}'              | 918    | 717 | 1'123 | 204  | 1'722 |
| 'Gaussian fit \sigma f_{nc}'            | 943    | 673 | 1'248 | 58   | 2'375 |
| '2 std Gaussian fit f_{nc}'             | 939    | 552 | 1'461 | -196 | 5'131 |

| 2.0 °C budgets (in GtCO <sub>2</sub> ) | Median | 33%  | 67%  | 5%   | 95%  |
|----------------------------------------|--------|------|------|------|------|
| 'Main case'                            | 1374   | 1110 | 1656 | 469  | 2550 |
| 'No uncertainty in any parameters'     | 1437   | 1437 | 1437 | 1437 | 1437 |
| 'No uncertainty in ZEC (ZEC = 0)'      | 1389   | 1166 | 1624 | 612  | 2358 |
| '2 std in ZEC'                         | 1359   | 995  | 1747 | 103  | 2970 |
| 'No uncertainty in T_{anth}'           | 1414   | 1190 | 1655 | 647  | 2422 |
| 'Gaussian fit \Delta T_{anth}'         | 1457   | 1164 | 1781 | 495  | 2887 |
| '2 std Gaussian fit \Delta T_{anth}'   | 1465   | 1046 | 1979 | 199  | 4207 |
| 'No uncertainty in E'                  | 1386   | 1125 | 1661 | 478  | 2502 |
| 'Gaussian fit E (same as main case)'   | 1374   | 1110 | 1656 | 469  | 2550 |
| '2 std Gaussian fit E'                 | 1344   | 1066 | 1654 | 438  | 2683 |
| 'No uncertainty in f_{nc}'             | 1385   | 1167 | 1609 | 611  | 2259 |
| 'Gaussian fit \sigma f_{nc}'           | 1412   | 1112 | 1753 | 434  | 3021 |
| '2 std Gaussian fit f_{nc}'            | 1406   | 969  | 1999 | 138  | 6181 |

Supplementary Table S5. Resulting remaining carbon budget ranges for 1.75 and 2.0 °C targets.

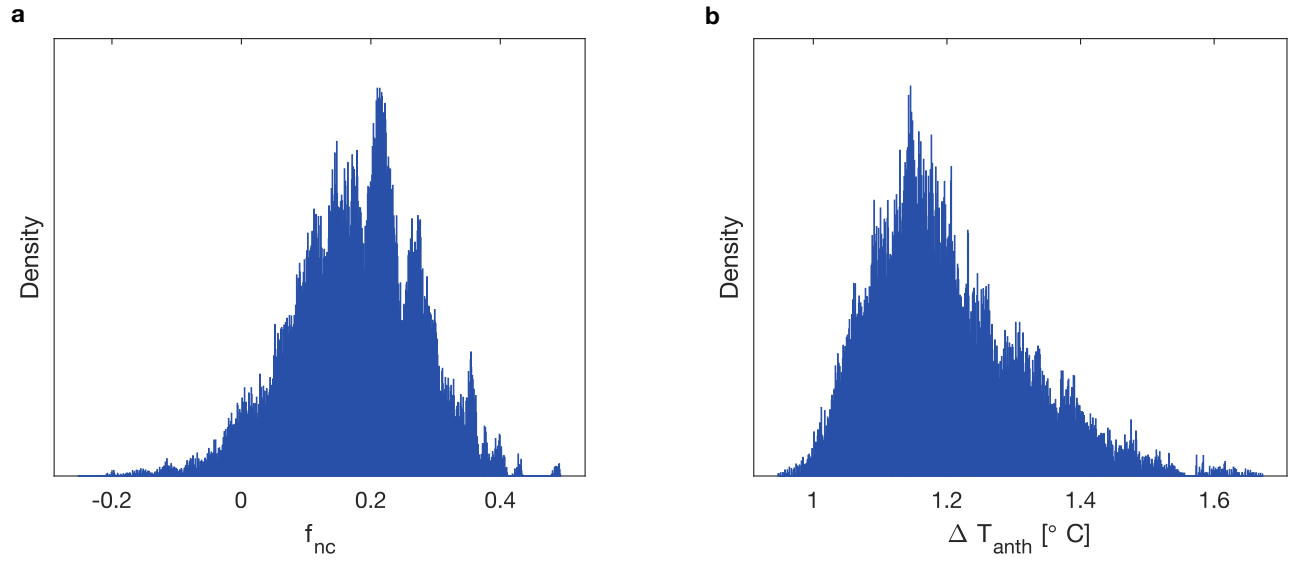

**Supplementary Figure S1.** Empirical distributions used to draw random samples for  $f_{nc}$  and  $\Delta T_{anth}$  in Eq.1 and Eq.3 labelled as the 'Main case'. (see Supplementary Table S1 and Methods for details).

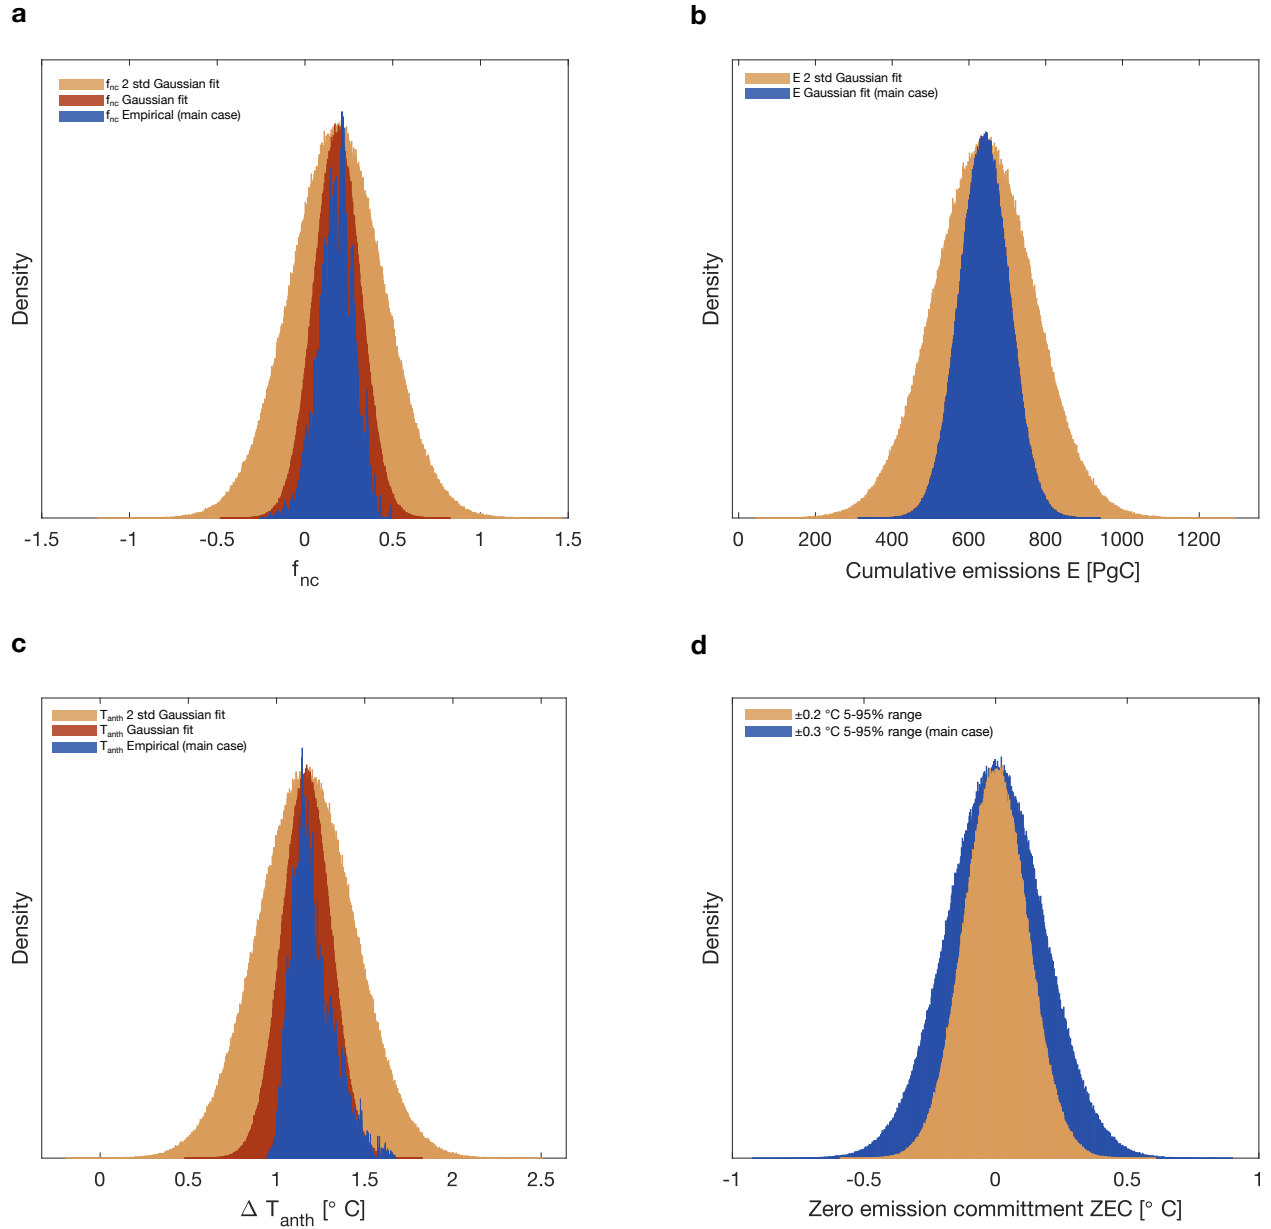

**Supplementary Figure S2. Distributions used for sampling in Eq.1 and Eq.3, including additional distributions for sensitivity analysis.** The red and orange distributions show Gaussian approximation of the empirical distributions. Distributions used for sampling in the main case are indicated by blue, as labelled. Panels (b) and (d) are based on Normal distributions, in which the blue distributions case is the same as the distribution used to sample in 'Main case' (see Supplementary Table S1 and S2). Orange distributions in panels a-c have the same mean as the red distributions, but inflated the variance (to twice the standard deviation, prior to sampling), in order to account for a wider spread in the uncertainty in each input parameter, in sensitivity analysis in Fig.1 and Fig.2.

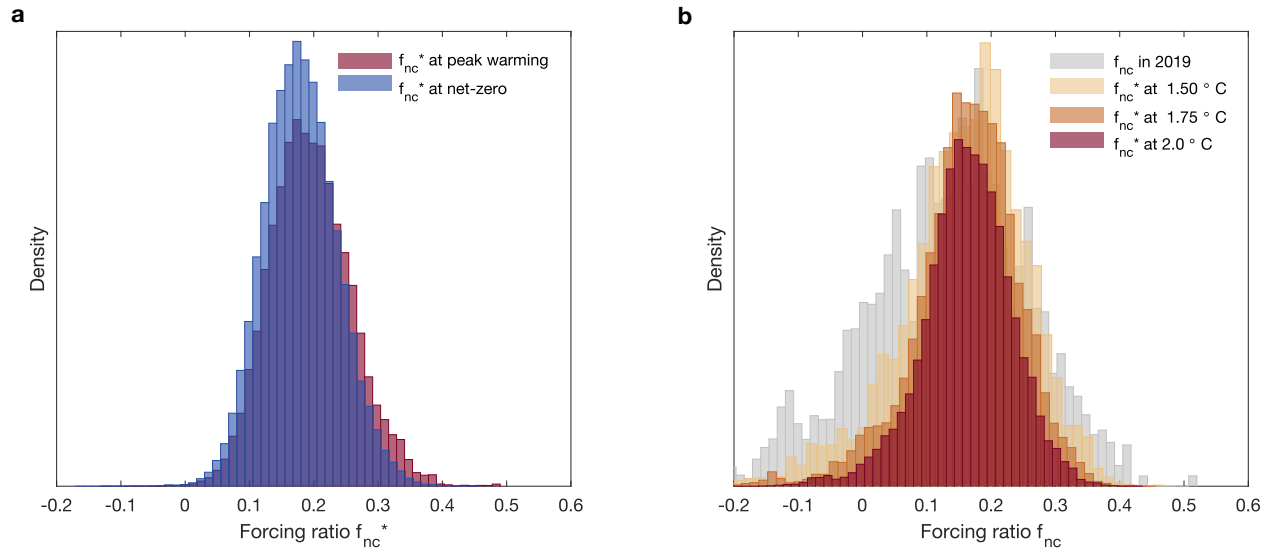

**Supplementary Figure S3. Radiative forcing ratio of non-CO<sub>2</sub> to total forcing for scenarios in the 1.5 °C scenario database.** (a) at the time of peak warming and at the time of net-zero emissions; (b) in the year 2019 (mean 1990-2019 value), and at the time when each temperature target is reached (1.5 °C, 1.75 °C, and 2.0 °C, respectively). For all warming targets, we use a linear approximation of  $f_{nc}^*$  as a function of  $f_{nc}$  (Supplementary Table S2).  $f_{nc}$  at peak warming and at net-zero are calculated for the 30-year mean prior to reaching net-zero emissions or peak warming.



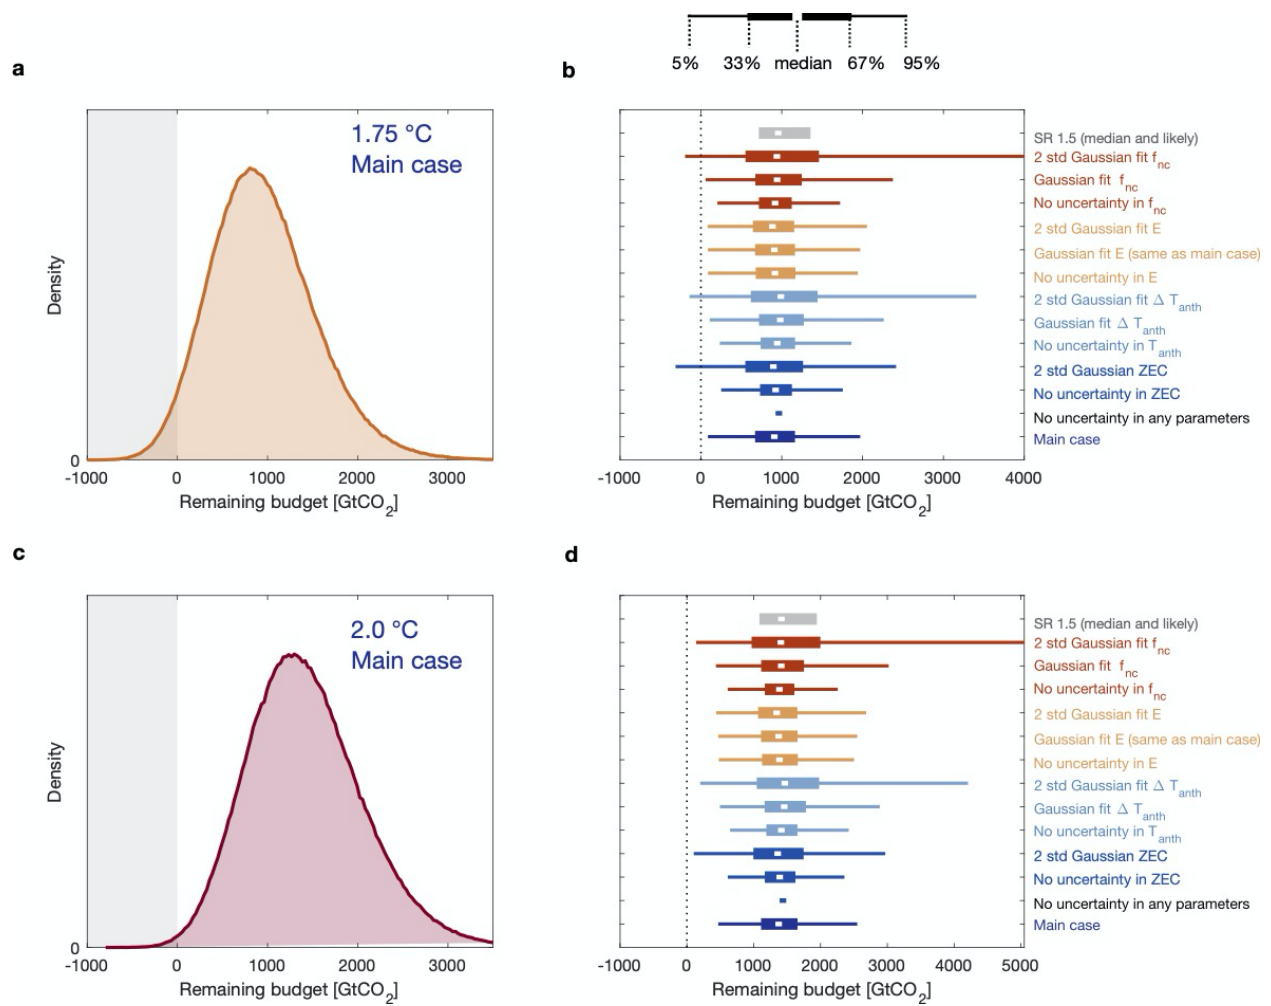

**Supplementary Figure S4. Distribution of the remaining carbon budget for 1.75 and 2.0 °C temperature targets, with cumulative CO<sub>2</sub> emissions from the beginning of the year 2020 onwards (left panels), and the effect of related geophysical uncertainties (right panels). (a,c)** Distribution of the remaining carbon budget for the “Main case” for 1.75 °C and 2.0 °C targets, respectively; **(b,d)** Sensitivity of the 1.75 °C and 2.0 °C remaining budgets, respectively, and their range to increased or decreased uncertainty in the input distributions of individual parameters (coloured bars as labelled on vertical axis) and comparison to the SR1.5 estimates (grey bars, where the upper grey bar represents the total range spanned by additional uncertainties that were not included in the median and 33–67<sup>th</sup> TCRE percentile range shown in the lower grey bar). SR1.5 numbers illustrated here adjusted downwards (based on Ref.<sup>19</sup>), to represent remaining budgets from the beginning of the year 2020, rather than 2018 as originally reported. The box plots indicate the median value, the 33–67% range, and the 5–95% range, as labelled.

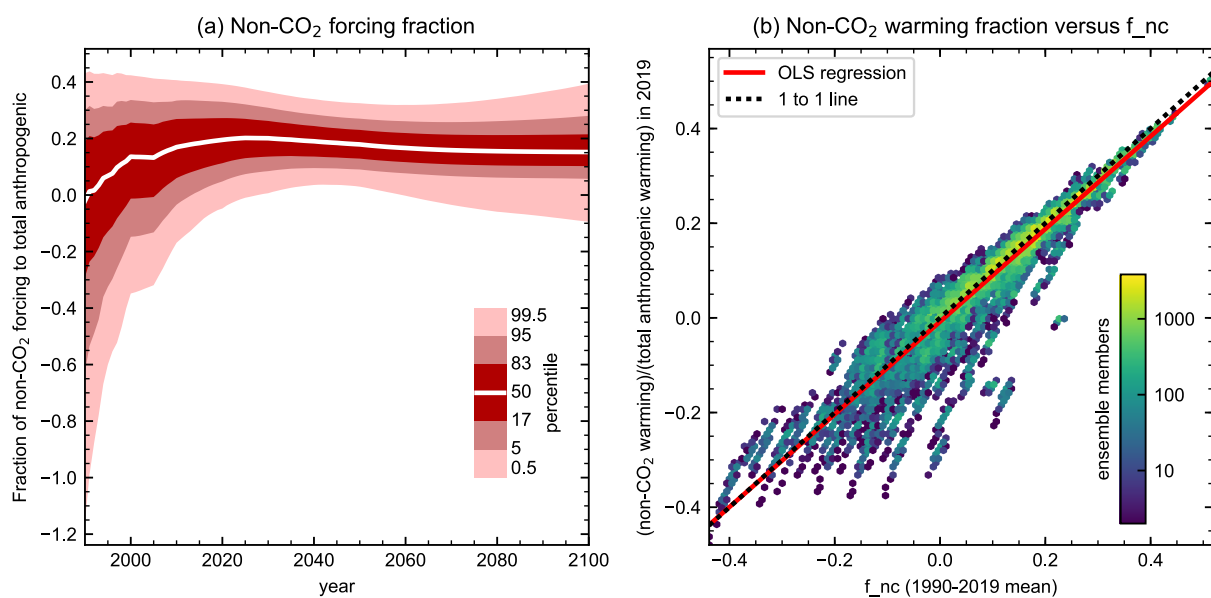

**Supplementary Fig. S5.** (a) Time series of non-CO<sub>2</sub> forcing fraction; (b) and non-CO<sub>2</sub> warming fraction as a function of the 30-year average (1990-2019) average of  $f_{nc}$ , with an ordinary least squares (OLS) regression line shown in red, and a reference 1:1 line shown by a black dashed line. The colour bar in panel (b) is logarithmic and indicates sample density (expressed as a number of ensemble members).

### **Supplementary References:**

Friedlingstein, P. *et al.* Global Carbon Budget 2019. *Earth System Science Data* **11**, 1783–1838 (2019).

Haustein, K. *et al.* A real-time Global Warming Index. *Scientific Reports* **7**, 15417 (2017).

MacDougall, *et al.* Is there warming in the pipeline? A multi-model analysis of the Zero Emissions Commitment from CO<sub>2</sub>. *Biogeosciences* **17**, 2987–3016 (2020).

Smith, C. J. *et al.* FAIR v1.3: a simple emissions-based impulse response and carbon cycle model. *Geoscientific Model Development* **11**, 2273–2297 (2018).
